# Supplementary material for: How prepared are UK medical graduates for practice? A rapid review of the literature 2009–2014
Source: PubMed Central journal article supplement — BMJ Open. 2017 Jan 13;7(1):e013656. doi: 10.1136/bmjopen-2016-013656 (PMC5253586; doi:10.1136/bmjopen-2016-013656), 2017-01-13
Supplement: bmjopen-2016-013656suppA.pdf [file bmjopen-2016-013656suppA.pdf]

# Online supplement A: Searches and Results

2009-2013

Database: Ovid MEDLINE(R) <1946 to June Week 4 2013>

436 Results

- 
- 1 Junior doctor\*1.mp. (1519)
  - 2 pre-registration house officer.tw. (57)
  - 3 (foundation doctor\* or F1 or FY1 or F2 or FY2 or foundation year 1 or foundation year one or foundation year 2 or foundation year two).tw. (40696)
  - 4 (PRHO\* or houseman\* or house man\* or house officer\* or intern).tw. (2826)
  - 5 new\* qualif\* doctor\*.tw. (97)
  - 6 (SHO or senior house officer\*).tw. (1005)
  - 7 (medic\* adj3 graduat\*).tw. (7127)
  - 8 "Internship and Residency"/ (34048)
  - 9 or/1-8 (82614)
  - 10 exp Professional Competence/ (82404)
  - 11 exp Clinical Competence/ (63261)
  - 12 exp Self Efficacy/ (11734)
  - 13 (Confidence adj3 practice).tw. (232)
  - 14 exp Professional Practice/ (215546)
  - 15 exp Resilience, Psychological/ (1272)
  - 16 exp coping behavior/ (100563)
  - 17 exp Competency-Based Education/ (2705)
  - 18 \*"Education, Medical, Graduate"/ (14401)
  - 19 \*"Education, Medical"/ (34246)
  - 20 "Education, Medical, Continuing"/ (20783)
  - 21 (prepar\* adj3 practi\*).tw. (2393)
  - 22 ((readiness or ready) adj3 practi\*).tw. (253)
  - 23 (transition\* adj3 pract\*).tw. (502)
  - 24 ((Competence or prepare\* or confiden\* or ready) adj3 (practise or purpose or employab\*).tw. (361)
  - 25 (resilien\* adj3 medical).tw. (18)
  - 26 (effective\* adj3 medical curriculum).tw. (4)
  - 27 foundation train\*.tw. (43)
  - 28 medical education.tw. (24142)
  - 29 professionalism.tw. (4052)
  - 30 prescribing skill\*1.tw. (58)
  - 31 scientific knowledge.tw. (3028)
  - 32 (fitness adj3 practise).tw. (76)
  - 33 (fitness adj3 purpose).tw. (156)
  - 34 (defin\* adj3 practi\*).tw. (2392)
  - 35 (asses\* adj3 prepar\*).tw. (1922)
  - 36 (toler\* adj3 uncert\*).tw. (174)
  - 37 Leadership.tw. (18613)
  - 38 Ethical manner.tw. (50)
  - 39 Clinical analysis.tw. (4760)
  - 40 Clinical\* effective\*.tw. (9746)
  - 41 Communicate effectively.tw. (392)
  - 42 \*"Communication"/ (26239)
  - 43 Communicate appropriately.tw. (4)
  - 44 Clinical responsibil\*.tw. (258)
  - 45 (Adapt adj3 chang\*).tw. (1810)

- 46 Patient safety.tw. (11959)  
 47 \*Patient Safety/ (1584)  
 48 Clinical judgement.tw. (1250)  
 49 Patient care.tw. (35296)  
 50 \*Quality Assurance, Health Care/ (27761)  
 51 Quality assurance.tw. (17192)  
 52 (CPD or Continuing professional development).tw. (3858)  
 53 (Inadequate adj3 (supervision or train\* or support or preparedness)).tw. (1614)  
 54 ((Inadequate or clinical) adj3 (supervision or train\* or support or preparedness)).tw. (18527)  
 55 clinical performance.tw. (4913)  
 56 (Situation adj3 uncertainty).tw. (51)  
 57 (Emergency adj3 judgement).tw. (8)  
 58 Safe prescribing.tw. (103)  
 59 Reflection.tw. (27262)  
 60 "Feedback"/ (26196)  
 61 (Work adj3 autonomously).tw. (18)  
 62 (Assistantship or Mentoring).tw. (3103)  
 63 psychology knowledge.mp. (4)  
 64 Psychology/ (20398)  
 65 or/10-64 (684911)  
 66 exp Great Britain/ (295235)  
 67 exp Scotland/ (20714)  
 68 exp Northern Ireland/ (3907)  
 69 exp Wales/ (11989)  
 70 (Great Britain or Britain or England or Scotland or Wales or Ireland or UK or United Kingdom or welsh or english or scottish or irish).tw. (229183)  
 71 or/66-70 (443340)  
 72 9 and 65 and 71 (1501)  
 73 limit 72 to yr="2009 -Current" (436)

## Database: CINAHL

191 Results

- 
1. TX "Junior doctor\*" (270)  
 2. TX "pre-registration house officer" (7)  
 3. TX "foundation doctor\*" OR "F1 w/3 doctor" OR "FY1 w/3 doctor" OR "F2 w/3 doctor" OR "FY2 w/3 doctor" OR "foundation year 1" OR "foundation year one" OR "foundation year 2" OR "foundation year two" (43)  
 4. TX PRHO\* OR "houseman\*" OR "house man\*" OR "house officer\*" OR intern (137)  
 5. TX "new\* qualif\* doctor\*" (33)  
 6. TX SHO OR "senior house officer\*" (134)  
 7. TX medic\* W3 graduat\* (404)  
 8. TX Internship AND TX Residency (272)  
 9. S1 OR S2 OR S3 OR S4 OR S5 OR S6 OR S7 OR S8 (1161)  
 10. (MH "Professional Competence+") (38881)  
 11. (MH "Clinical Competence+") (24361)  
 12. (MM "Self-Efficacy") (3740)  
 13. AB confidence OR AB practice OR AB "junior doctor\*" (163157)  
 14. (MH "Professional Practice+") (165677)  
 15. (MH "Adaptation, Psychological+") (21194)  
 16. TX "coping behaviour" (430)  
 17. TX "Competency-Based Education" (364)  
 18. TX \*Education, Medical, Graduate (3708)  
 19. (MH "Education, Medical+") (20984)

20. (MM "Education, Medical, Continuing") (2286)
21. AB (prepar\* W3 practi\*) (1024)
22. TX (readiness W3 practi\*) OR (ready W3 practi\*) (670)
23. TX (transition\* W3 pract\*) (2367)
24. TX ((Competence OR prepare\* OR confiden\* OR ready) W3 (practise OR purpose OR employab\*)). (672)
25. TX (resilien\* W3 medical) (195)
26. TX (effective\* W3 medical curriculum) (10)
27. TI "foundation train\*" OR AB "foundation train\*" (29)
28. TI medical education OR AB medical education (5841)
29. TI professionalism OR AB professionalism (2555)
30. TI "prescribing skill\*" OR AB "prescribing skill\*" (22)
31. TI "scientific knowledge" OR AB "scientific knowledge" (834)
32. TI ( fitness W3 practise) OR AB (fitness W3 practise) (163)
33. TI (fitness W3 purpose) OR AB (fitness W3 purpose) (64)
34. TI (defin\* W3 practi\*) OR AB (defin\* W3 practi\*) (867)
35. TI (asses\* W3 prepar\*) OR AB(asses\* W3 prepar\*) (374)
36. TI (toler\* W3 uncert\*) OR AB (toler\* W3 uncert\*) (39)
37. TI "Leadership" OR AB "Leadership" (16780)
38. TI "Ethical manner" OR AB "Ethican manner" (1)
39. TI "Clinical analysis" OR AB "Clinical analysis" (205)
40. TI "Clinical\* effective\*" OR AB "Clinical\* effective\*" (2166)
41. TI "Communicate effectively" OR AB "Communicate effectively" (248)
42. TI (\*"Communication") OR AB (\*"Communication") (40288)
43. TI "Communicate appropriately" OR AB "Communicate appropriately" (1)
44. TI "Clinical responsibil\*" OR AB "Clinical responsibil\*" (91)
45. TI (Adapt W3 chang\*) OR AB (Adapt W3 chang\*) (323)
46. TI "Patient safety" OR AB "Patient safety" (9589)
47. TI "\*Patient Safety" OR AB "\*Patient Safety" (9589)
48. TI "Clinical judgement" OR AB "Clinical judgement" (327)
49. TI "Patient care" OR AB "Patient care" (18319)
50. TX "\*Quality Assurance, Health Care" (38)
51. TI "Quality assurance" OR AB "Quality assurance" (3894)
52. TX CPD OR "Continuing professional development" (5258)
53. TX (Inadequate W3 (supervision or train\* OR support OR preparedness)) (3657)
54. TX ((Inadequate OR clinical) W3 (supervision OR train\* OR support OR preparedness)) (26663)
55. TI "clinical performance" OR AB "clinical performance" (1280)
56. TI (Situation W3 uncertainty) OR AB (Situation W3 uncertainty)(20)
57. TI (Emergency W3 judgement) OR AB (Emergency W3 judgement) (1)
58. TI "Safe prescribing" OR AB "Safe prescribing" (90)
59. TI "Reflection" OR AB "Reflection" (7175)
60. TX "Feedback" (70168)
61. TI (Work W3 autonomously) OR AB (Work W3 autonomously) (13)
62. TI (Assistantship OR Mentoring) OR AB (Assistantship OR Mentoring) (3024)
63. TX "psychology knowledge" (10)
64. (MH "Psychology, Occupational") (411)
65. S10 OR S11 OR S12 OR S13 OR S14 OR S15 OR S16 OR S17 OR S18 OR S19 OR S20 OR S21 OR S22 OR S23 OR S24 OR S25 OR S26 OR S27 OR S28 OR S29 OR S30 OR S31 OR S32 OR S33 OR S34 OR S35 OR S36 OR S37 OR S38 OR S39 OR S40 OR S41 OR S42 OR S43 OR S44 OR S45 OR S46 OR S47 OR S48 OR S49 OR S50 OR S51 OR S52 OR S53 OR S54 OR S55 OR S56 OR S57 OR S58 OR S59 OR S60 OR S61 OR S62 OR S63 OR S64 (509,723)
66. (MH "Great Britain+") (72,023)
67. (MH "Scotland") (11,985)
68. (MH "Northern Ireland") (2,556)

69. (MH "Wales") (5,894)
70. TI ( ("Great Britain" OR Britain OR England OR Scotland OR Wales OR Ireland OR UK OR "United Kingdom" OR welsh OR english OR scottish OR irish ) OR AB ( ("Great Britain" OR Britain OR England OR Scotland OR Wales OR Ireland OR UK OR "United Kingdom" OR welsh OR english OR scottish OR irish ) ) (75,158)
71. S66 OR S67 OR S68 OR S69 OR S70 (127,706)
72. S9 AND S65 AND S71 (191)

## Database : ERIC

1540879 Results

- 
1. AB,TI(Junior doctor\*1) (51)
  2. ab,ti(pre-registration house officer) (1)
  3. ab,ti(("foundation doctor\*" OR F1 OR FY1 OR F2 OR FY2 OR "foundation year 1" OR "foundation year one" OR "foundation year 2" OR "foundation year two")) (125)
  4. AB,TI(PRHO\* OR "houseman\*" OR "house man\*" OR "house officer\*" OR intern) (2796)
  5. AB,TI(new\* qualif\* doctor\*) (81)
  6. AB,TI(SHO OR "senior house officer\*") (11)
  7. AB,TI(medic\* NEAR/3 graduat\*) (786)
  8. AB,TI(Internship and Residency) (82)
  9. S1 OR S2 OR S3 OR S4 OR S5 OR S6 OR S7 OR S8 (3893)
  10. SU.EXACT.EXPLODE("Professional Competence") (3)
  11. SU.EXACT.EXPLODE("Clinical Competence") (13)
  12. SU.EXACT.EXPLODE("Self Efficacy") (6944)
  13. AB,TI((Confidence NEAR/3 practice)) (88)
  14. Professional AND Practice (30366)
  15. SU.EXACT.EXPLODE("Resilience (Psychology)") (755)
  16. SU.EXACT.EXPLODE("Coping") (9243)
  17. SU.EXACT.EXPLODE("Competency Based Education") (10649)
  18. AB,TI(\*Education, Medical, Graduate) (718)
  19. AB,TI(\*Education, Medical) (7166)
  20. AB,TI(Education, Medical, Continuing) (853)
  21. AB,TI((prepar\* NEAR/3 practi\*)) (1893)
  22. AB,TI readiness OR ready NEAR/3 practi\* (60)
  23. AB,TI((transition\* NEAR/3 pract\*)) (528)
  24. AB,TI((Competence OR prepare\* OR confiden\* OR ready) NEAR/3 (practise OR purpose OR employab\*)) (921)
  25. AB,TI((resilien\* NEAR/3 medical)) (4)
  26. AB,TI(effective\* NEAR/3 "medical curriculum") (2)
  27. AB,TI("foundation train\*") (17)
  28. AB,TI("medical education") (2345)
  29. AB,TI("professionalism") (3226)
  30. AB,TI("prescribing skill\*") (4)
  31. AB,TI("scientific knowledge") (1168)
  32. AB,TI(fitness NEAR/3 practise) (35)
  33. AB,TI(fitness NEAR/3 purpose) (71)
  34. ("defin\*" NEAR/3 "practi\*") (1434)
  35. ("asses\*" NEAR/3 "prepar\*") (1106)
  36. AB,TI(toler\* NEAR/3 uncert\*) (46)
  37. "Leadership" (56817)
  38. "Ethical manner" (26)
  39. "Clinical analysis" (30)

40. "Clinical\* effective\*" (50)
41. ("Communicate effectively") (483)
42. "\*Communication" (129322)
43. "Communicate appropriately" (6)
44. "Clinical responsibil\*" (6)
45. Adapt NEAR/3 chang\* (573)
46. "\*Patient Safety" (79)
47. "Clinical judgement" (14)
48. "Patient care" (811)
49. "\*Quality Assurance", "Health Care" (53)
50. "Quality assurance" (2883)
51. CPD OR "Continuing professional development" (846)
52. AB, TI (Inadequate NEAR/3 (supervision or train\* or support or preparedness)(648)
53. (Inadequate OR clinical) NEAR/3 (supervision OR train\* OR support OR preparedness) (2523)
54. "clinical performance" (173)
55. Situation NEAR/3 uncertainty (36)
56. Emergency OR judgement (19881)
57. Safe prescribing (5)
58. Reflection (22435)
59. "Feedback" (25970)
60. Work NEAR/3 autonomously (11)
61. Assistantship OR Mentoring (7302)
62. "psychology knowledge" (15)
63. Psychology (122587)
64. S10 OR S11 OR S12 OR S13 OR S14 OR S15 OR S16 OR S17 OR S18 OR S19 OR S20 OR S21 OR S22 OR S23 OR S24 OR S25 OR S26 OR S27 OR S28 OR S29 OR S30 OR S31 OR S32 OR S33 OR 34 OR 35 OR 36 OR 37 OR 38 OR 39 OR 40 OR 41 OR 42 OR 43 OR 44 OR 45 OR 46 OR 47 OR 48 OR 49 OR 50 OR 51 OR 51 OR 52 OR 53 OR 53 OR 54 OR 55 OR 56 OR 57 OR 58 OR 59 OR 60 OR 61 OR 62 OR 63 (409300)
65. "Great Britain" (9473)
66. "Scotland" (4290)
67. "Northern Ireland" (1270)
68. "Wales" (4909)
69. AB, TI(Great Britain OR Britain OR England OR Scotland OR Wales OR Ireland OR UK OR United Kingdom OR welsh OR english OR scottish OR irish) (1540880)
70. S35 OR S35 OR S37 OR S38 OR S39 (1540879)

## Database: HMIC

71 Results

- 
- 1 Junior doctor\*1.mp. (883)
  - 2 pre-registration house officer.tw. (20)
  - 3 (foundation doctor\* or F1 or FY1 or F2 or FY2 or foundation year 1 or foundation year one or foundation year 2 or foundation year two).tw. (43)
  - 4 (PRHO\* or houseman\* or house man\* or house officer\* or intern).tw. (452)
  - 5 new\* qualif\* doctor\*.tw. (31)
  - 6 (SHO or senior house officer\*).tw. (269)
  - 7 (medic\* adj3 graduat\*).tw. (263)
  - 8 "Internship and Residency"/ (1)
  - 9 or/1-8 (1543)
  - 10 exp Professional Competence/ (536)
  - 11 exp Students/ or exp Assessment/ or exp Clinical practice/ or exp Professional competence/ or exp medical staff/ or exp Skills/ or exp Competence assessment/ (37158)

12 Self Efficacy.mp./ (346)  
13 (Confidence adj3 practice).tw. (34)  
14 exp Professional Practice/ (15225)  
15 exp Stress/ or exp Mental health/ or exp Depression/ (9267)  
16 exp Occupational stress/ or exp Statistical data/ or exp Students/ or exp behaviour/  
(48128)  
17 exp Competence based learning/ 29  
18 \*"Education, Medical, Graduate"/ (0)  
19 \*"Education, Medical"/ (0)  
20 "Education, Medical, Continuing"/ (0)  
21 (prepar\* adj3 practi\*).tw. (247)  
22 ((readiness or ready) adj3 practi\*).tw. (25)  
23 (transition\* adj3 pract\*).tw. (37)  
24 ((Competence or prepare\* or confiden\* or ready) adj3 (practise or purpose or  
employab\*).tw. (29)  
25 (resilien\* adj3 medical).tw. (4)  
26 (effective\* adj3 medical curriculum).tw. (0)  
27 foundation train\*.tw. (16)  
28 medical education.tw. (1308)  
29 professionalism.tw. (458)  
30 prescribing skill\*1.tw. (3)  
31 scientific knowledge.tw. (103)  
32 (fitness adj3 practise).tw. (75)  
33 (fitness adj3 purpose).tw. (51)  
34 (defin\* adj3 practi\*).tw. (242)  
35 (asses\* adj3 prepar\*).tw. (88)  
36 (toler\* adj3 uncert\*).tw. (8)  
37 Leadership.tw. (3328)  
38 Ethical manner.tw. (6)  
39 Clinical analysis.tw. (9)  
40 Clinical\* effective\*.tw. (1089)  
41 Communicate effectively.tw. (40)  
42 "Communication"/ (10086)  
43 Communicate appropriately.tw. (1)  
44 Clinical responsibil\*.tw. (59)  
45 (Adapt adj3 chang\*).tw. (82)  
46 Patient safety.tw. (1687)  
47 exp Patient Safety/ (2553)  
48 Clinical judgement.tw. (149)  
49 Patient care.tw. (4919)  
50 exp Quality assurance in health services/ (15975)  
51 Quality assurance.tw. (2746)  
52 (CPD or Continuing professional development).tw. (458)  
53 (Inadequate adj3 (supervision or train\* or support or preparedness)).tw. (186)  
54 ((Inadequate or clinical) adj3 (supervision or train\* or support or preparedness)).tw. (1469)  
55 clinical performance.tw. (204)  
56 (Situation adj3 uncertainty).tw. (2)  
57 (Emergency adj3 judgement).tw. (0)  
58 Safe prescribing.tw. (5)  
59 Reflection.tw. (759)  
60 "Feedback"/ (148)  
61 (Work adj3 autonomously).tw. (9)  
62 (Assistantship or Mentoring).tw. (246)  
63 psychology knowledge.mp. (1)  
64 Psychology/ (349)  
65 or/10-64 (118047)

- 66 exp Great Britain/ (443)
- 67 exp Scotland/ (5016)
- 68 exp Northern Ireland/ (1368)
- 69 exp Wales/ (3558)
- 70 (Great Britain or Britain or England or Scotland or Wales or Ireland or UK or United Kingdom or welsh or english or scottish or irish).tw. (51863)
- 71 or/66-70 (54958)
- 72 9 and 65 and 71 (340)
- 73 limit 72 to yr="2009 -Current" (71)

## Database: Ovid PsychINFO

51 Results

- 
- 1 Junior doctor\*1.mp. (227)
  - 2 pre-registration house officer.tw. (10)
  - 3 (foundation doctor\* or F1 or FY1 or F2 or FY2 or foundation year 1 or foundation year one or foundation year 2 or foundation year two).tw. (1316)
  - 4 (PRHO\* or houseman\* or house man\* or house officer\* or intern).tw. (545)
  - 5 new\* qualif\* doctor\*.tw. (20)
  - 6 (SHO or senior house officer\*).tw. (104)
  - 7 (medic\* adj3 graduat\*).tw. (1057)
  - 8 "Internship and Residency"/ (14)
  - 9 or/1-8 (3126)
  - 10 exp Professional Competence/ (3549)
  - 11 exp Clinical Competence/ (314)
  - 12 exp Self Efficacy/ (8479)
  - 13 (Confidence adj3 practice).tw. (107)
  - 14 exp Professional Practice/ (2368)
  - 15 exp Resilience, Psychological/ (5149)
  - 16 exp coping behavior/ (16976)
  - 17 exp Competency-Based Education/ (55)
  - 18 \*"Education, Medical, Graduate"/ (0)
  - 19 \*"Education, Medical"/ (0)
  - 20 "Education, Medical, Continuing"/ (0)
  - 21 (prepar\* adj3 practi\*).tw. (906)
  - 22 ((readiness or ready) adj3 practi\*).tw. (129)
  - 23 (transition\* adj3 pract\*).tw. (392)
  - 24 ((Competence or prepare\* or confiden\* or ready) adj3 (practise or purpose or employab\*).tw. (126)
  - 25 (resilien\* adj3 medical).tw. (13)
  - 26 (effective\* adj3 medical curriculum).tw. (0)
  - 27 foundation train\*.tw. (12)
  - 28 medical education.tw. (4777)
  - 29 professionalism.tw. (2017)
  - 30 prescribing skill\*1.tw. (5)
  - 31 scientific knowledge.tw. (1494)
  - 32 (fitness adj3 practise).tw. (20)
  - 33 (fitness adj3 purpose).tw. (40)
  - 34 (defin\* adj3 practi\*).tw. (994)
  - 35 (asses\* adj3 prepar\*).tw. (351)
  - 36 (toler\* adj3 uncert\*).tw. (125)
  - 37 Leadership.tw. (23242)
  - 38 Ethical manner.tw. (57)
  - 39 Clinical analysis.tw. (151)

- 40 Clinical\* effective\*.tw. (874)
- 41 Communicate effectively.tw. (258)
- 42 \*"Communication"/ (6804)
- 43 Communicate appropriately.tw. (8)
- 44 Clinical responsibil\*.tw. (68)
- 45 (Adapt adj3 chang\*).tw. (571)
- 46 Patient safety.tw. (1348)
- 47 \*Patient Safety/ (0)
- 48 Clinical judgement.tw. (160)
- 49 Patient care.tw. (4238)
- 50 \*Quality Assurance, Health Care/ (0)
- 51 Quality assurance.tw. (1033)
- 52 (CPD or Continuing professional development).tw. (709)
- 53 (Inadequate adj3 (supervision or train\* or support or preparedness)).tw. (494)
- 54 ((Inadequate or clinical) adj3 (supervision or train\* or support or preparedness)).tw. (5392)
- 55 clinical performance.tw. (298)
- 56 (Situation adj3 uncertainty).tw. (36)
- 57 (Emergency adj3 judgement).tw. (0)
- 58 Safe prescribing.tw. (16)
- 59 Reflection.tw. (13071)
- 60 "Feedback"/ (5164)
- 61 (Work adj3 autonomously).tw. (8)
- 62 (Assistantship or Mentoring).tw. (4412)
- 63 psychology knowledge.mp. (38)
- 64 Psychology/ (9476)
- 65 or/10-64 (115354)
- 66 exp Great Britain/ (755)
- 67 exp Scotland/ (2039)
- 68 exp Northern Ireland/ (1173)
- 69 exp Wales/ (3294)
- 70 (Great Britain or Britain or England or Scotland or Wales or Ireland or UK or United Kingdom or welsh or english or scottish or irish).tw. (63028)
- 71 or/66-70 (63037)
- 72 9 and 65 and 71 (92)
- 73 limit 72 to yr="2009 -Current" (51)

## Database: Web of Science

253 Results

- 
- 1. TS=(Junior doctor\*) [580]
  - 2. TS=("pre-registration house officer") [3]
  - 3. TS=("foundation doctor\*" OR (F1 NEAR/3 doctor) OR (FY1 NEAR/3 doctor) OR (F2 N/3 doctor) OR (FY2 N/3 doctor) OR "foundation year 1" OR "foundation year one" OR " foundation year 2" OR "foundation year two") [67]
  - 4. TS=((PRHO\* OR "houseman\*" OR "house man\*" OR " house officer\*" OR intern)) [1367]
  - 5. TS=(new\* qualif\* doctor\*) [77]
  - 6. TS=((SHO OR "senior house officer\*")) [232]
  - 7. TS=((medic\* NEAR/3 graduat\*)) [1829]
  - 8. TS=("Internship and Residency") [167]
  - 9. #8 OR #7 OR #6 OR #5 OR #4 OR #3 OR #2 OR #1 [3948]
  - 10. TS="Professional Competence" [1365]
  - 11. TS="Clinical Competence" [2359]
  - 12. TS="Self Efficacy" [9869]



13. TS= (Confidence NEAR/3 practice) [171]
14. TS="Professional Practice" [10843]
15. TS=(Resilience AND Psychological) [360]
16. TS=(coping behavio\$r) [2835]
17. TS="Competency-Based Education" [117]
18. TS>(\*Education, Medical, Graduate") [12]
19. TS>(\*Education, Medical") [144]
20. TS="Education, Medical, Continuing" [12]
21. TS= (prepar\* NEAR/3 practi\*) [1061]
22. TS=((readiness OR ready) NEAR/3 practi\*) [154]
23. TS=(transition\* NEAR/3 pract\*) [351]
24. TS=((Competence OR prepare\* OR confiden\* OR ready) NEAR/3 (practise OR purpose OR employab\*)) [1079]
25. TS= (resilien\* NEAR/3 medical) [11]
26. TS= (effective\* N/3 "medical curriculum"). [2]
27. TS="foundation train\*" [40]
28. TS= "medical education" [15569]
29. TS= professionalism [1440]
30. TS= "prescribing skill\*" [30]
31. TS= "scientific knowledge" [1432]
32. TS= (fitness NEAR/3 practice) [91]
33. TS= (fitness NEAR/3 purpose) [166]
34. TS= (defin\* NEAR/3 practi\*) [1150]
35. TS= (asses\* NEAR/3 prepar\*) [834]
36. TS= (toler\* NEAR/3 uncert\*) [213]
37. TS= "Leadership" [5677]
38. TS= "Ethical manner" [14]
39. TS= "Clinical analysis" [806]
40. TS= "Clinical\* effective\*" [2393]
41. TS= "Communicate effectively" [116]
42. TS=(\*"Communication") [103616]
43. TS= (Communicate AND appropriately) [102]
44. TS= "Clinical responsibil\*" [64]
45. TS= (Adapt NEAR/3 chang\*) [3195]
46. TS= "Patient safety" [5936]
47. TS= "\*Patient Safety" [5943]
48. TS= "Clinical judgement" [171]
49. TS= "Patient care" [7543]
50. TS= ("\*Quality Assurance" AND "Health Care") [313]
51. TS= "Quality assurance" [5810]
52. TS= (CPD OR "Continuing professional development") [1358]
53. TS= (Inadequate NEAR/3 (supervision OR train\* OR support OR preparedness)) [522]
54. TS= ((Inadequate OR clinical) NEAR/3 (supervision OR train\* OR support OR preparedness)) [8204]
55. TS= "clinical performance" [1566]
56. TS= (Situation NEAR/3 uncertainty) [193]
57. TS= (Emergency NEAR/3 judgement) [11]
58. TS= "Safe prescribing" [45]
59. TS= "Reflection" [35439]
60. TS="Feedback" [66710]
61. TS= (Work NEAR/3 autonomously) [73]
62. TS=(Assistantship OR Mentoring) [2370]
63. TS= "psychology knowledge" [3]
64. TS= Psychology [5855]
65. #64 OR #63 OR #62 OR #61 OR #60 OR #59 OR #58 OR #57 OR #56 OR #55 OR #54 OR #53 OR #52 OR #51 OR #50 OR #49 OR #48 OR #47 OR #46 OR #45 OR

- #44 OR #43 OR #42 OR #41 OR #40 OR #39 OR #38 OR #37 OR #36 OR #35 OR #34 OR #33 OR #32 OR #31 OR #30 OR #29 OR #28 OR #27 OR #26 OR #25 OR #24 OR #23 OR #22 OR #21 OR #20 OR #19 OR #18 OR #17 OR #16 OR #15 OR #14 OR #13 OR #12 OR #11 OR #10 [280693]
66. TS="Great Britain" [2352]
67. TS= Scotland [4574]
68. TS="Northern Ireland" [1061]
69. TS=Wales [6836]
70. TS= ("Great Britain" OR Britain OR England OR Scotland OR Wales OR Ireland OR UK OR "United Kingdom" OR welsh OR english OR scottish OR irish) [127342]
71. #70 OR #69 OR #68 OR #67 OR #66 [127342]
72. 9 and 65 and 71 [253]

## Database SCOPUS

199 RESULTS

- 
1. "Junior doctor\*" [ALL] 8201
  2. "pre-registration house officer" [ABS, TITLE, KEYWORD] 176
  3. "foundation doctor\*" or "F1 W/3 doctor" or "FY1 W/3 doctor" or "F2 W/3 doctor" or "FY2 W/3 doctor" or "foundation year 1" or "foundation year one" or "foundation year 2" or "foundation year two" [ABS, TITLE, KEYWORD] 7915
  4. ("PRHO\*" or "houseman\*" or "house man\*" or "house officer\*" or "intern") [ABS, TITLE, KEYWORD] 2401
  5. new\* qualif\* doctor\*[ABS, TITLE, KEYWORD] 684
  6. ("SHO" or "senior house officer\*") [ABS, TITLE, KEYWORD] 734
  7. (medic\* W/3 graduat\*) [ABS, TITLE, KEYWORD] 30,467
  8. "Internship and Residency" [ALL] 32,262
  9. #1 OR #2 etc (can only search a certain amount of characters, need to add in fields) 72,517
  10. "Professional Competence" [ALL] 90,912
  11. "Clinical Competence" [ALL] 176,240
  12. "Self Efficacy" [ALL] 250,195
  13. (Confidence W/3 practice) [ABS, TITLE, KEYWORD] 1,479
  14. "Professional Practice" [ALL] 459,448
  15. "Resilience, Psychological" [ALL] 1,156
  16. "coping behavi?r" [ALL] 162,502
  17. "Competency-Based Education" [ALL] 8,151
  18. \*"Education, Medical, Graduate"[ALL] 20,251
  19. \*"Education, Medical"[ALL] 154,535
  20. "Education, Medical, Continuing"[ALL] 19,735
  21. (prepar\* W/3 practi\*)[ABS, TITLE, KEYWORD] 7,666
  22. ((readiness or ready) W/3 practi\*) [ABS, TITLE, KEYWORD] 844
  23. (transition\* W/3 pract\*)[ABS, TITLE, KEYWORD] 2216
  24. ((Competence or prepare\* or confiden\* or ready) W/3 (practise or purpose or employab\*)) [ABS, TITLE, KEYWORD] 2,181
  25. (resilien\* W/3 medical) [ABS, TITLE, KEYWORD] 59
  26. (effective\* W/3 medical curriculum) [ABS, TITLE, KEYWORD] 298
  27. "foundation train\*" [ABS, TITLE, KEYWORD] 9,217
  28. "medical education" [ABS, TITLE, KEYWORD] 347,912
  29. professionalism [ABS, TITLE, KEYWORD] 11,239
  30. "prescribing skill\*" [ABS, TITLE, KEYWORD] 733
  31. "scientific knowledge" [ABS, TITLE, KEYWORD] 9213
  32. (fitness W/3 practise) [ABS, TITLE, KEYWORD] 129
  33. (fitness W/3 purpose) [ABS, TITLE, KEYWORD] 1,065
  33. (defin\* W/3 practi\*) [ABS, TITLE, KEYWORD] 8483

35 (asses\* W/3 prepar\*)[ABS, TITLE, KEYWORD]5925  
 36 (toler\* W/3 uncert\*)[ABS, TITLE, KEYWORD] 1303  
 37 Leadership[ABS, TITLE, KEYWORD] 88435  
 38 "Ethical manner"[ABS, TITLE, KEYWORD] 140  
 39 "Clinical analysis"[ABS, TITLE, KEYWORD]1692524  
 40 "Clinical\* effective\*"[ABS, TITLE, KEYWORD]625660  
 41 "Communicate effectively"[ABS, TITLE, KEYWORD] 3551  
 42 "Communication" [ALL] 4960405  
 43 "Communicate appropriately"[ABS, TITLE, KEYWORD] 17  
 44 "Clinical responsibil\*"[ABS, TITLE, KEYWORD] 20772  
 45 (Adapt W/3 chang\*)[ABS, TITLE, KEYWORD] 9947  
 46 "Patient safety"[ABS, TITLE, KEYWORD] 291353  
 47 "Patient Safety" [ALL] 84150  
 48 "Clinical judgement"[ABS, TITLE, KEYWORD] 20704  
 49 "Patient care"[ABS, TITLE, KEYWORD] 1143807  
 50 "Quality assurance in health services" [ABS, TITLE, KEYWORD] 18684  
 51 "Quality assurance"[ABS, TITLE, KEYWORD] 125626  
 52 (CPD or "Continuing professional development") [ABS, TITLE, KEYWORD] 7959  
 53 (Inadequate W/3 (supervision or train\* or support or preparedness)) [ABS, TITLE, KEYWORD] 3246  
 54 ((Inadequate or clinical) W/3 (supervision or train\* or support or preparedness)) [ABS, TITLE, KEYWORD] 43954  
 55 "clinical performance"[ABS, TITLE, KEYWORD] 258325  
 56 (Situation W/3 uncertainty) [ABS, TITLE, KEYWORD] 1177  
 57 (Emergency W/3 judgement) [ABS, TITLE, KEYWORD] 105  
 58 "Safe prescribing"[ABS, TITLE, KEYWORD] 1468  
 59 Reflection[ABS, TITLE, KEYWORD] 336065  
 60 "Feedback" [ALL] 354706  
 61 (Work W/3 autonomously) [ABS, TITLE, KEYWORD] 213  
 62 (Assistantship or Mentoring) [ABS, TITLE, KEYWORD] 8535  
 63 "psychology knowledge" [ABS, TITLE, KEYWORD] 23557  
 64 Psychology [ALL] 391730  
 65 #10-64 (Manually combine all) 1115811  
 66 "Great Britain" [ALL] 296,897  
 67 Scotland [ALL] 198,883  
 68 "Northern Ireland"[ALL] 46,455  
 69 "Wales" 401,528  
 70 ("Great Britain "or Britain or England or Scotland or "Wales" or Ireland or UK or "United Kingdom" or welsh or english or scottish or irish) 1,734,719  
 71 #66-70 (Manually combine all) 9,319  
 72 9 and 65 and 71 2,654  
 73 limit search result 72, to years 2009-2013, manually input all limitations/exclusions as per the protocol into the relevant boxes 199

## 2013-2014

### Database: CINAHL

Search strategy:

- 
1. TX "Junior doctor\*" (3720)
  2. TX "pre-registration house officer" (155)

3. TX "foundation doctor\*" OR "F1 w/3 doctor" OR "FY1 w/3 doctor" OR "F2 w/3 doctor" OR "FY2 w/3 doctor" OR "foundation year 1" OR "foundation year one" OR "foundation year 2" OR "foundation year two" (255)
4. TX PRHO\* OR "houseman\*" OR "house man\*" OR "house officer\*" OR intern (3215)
5. TX "new\* qualif\* doctor\*" (297)
6. TX SHO OR "senior house officer\*" (1608)
7. TX medic\* W3 graduat\* (7207)
8. TX Internship AND TX Residency (9851)
9. S1 OR S2 OR S3 OR S4 OR S5 OR S6 OR S7 OR S8 (21334)
10. (MH "Professional Competence+") (41883)
11. (MH "Clinical Competence+") (26193)
12. (MM "Self-Efficacy") (4168)
13. AB confidence OR AB practice OR AB "junior doctor\*" (174421)
14. (MH "Professional Practice+") (177623)
15. (MH "Adaptation, Psychological+") (22476)
16. TX "coping behaviour" (458)
17. TX "Competency-Based Education" (391)
18. TX \*Education, Medical, Graduate (3981)
19. (MH "Education, Medical+") (22777)
20. (MM "Education, Medical, Continuing") (2423)
21. AB (prepar\* W3 practi\*) (1085)
22. TX (readiness W3 practi\*) OR (ready W3 practi\*) (719)
23. TX (transition\* W3 pract\*) (2581)
24. TX ((Competence OR prepare\* OR confiden\* OR ready) W3 (practise OR purpose OR employab\*)). (711)
25. TX (resilien\* W3 medical) (194)
26. TX (effective\* W3 medical curriculum) (58)
27. TI "foundation train\*" OR AB "foundation train\*" (34)
28. TI medical education OR AB medical education (8282)
29. TI professionalism OR AB professionalism (2722)
30. TI "prescribing skill\*" OR AB "prescribing skill\*" (23)
31. TI "scientific knowledge" OR AB "scientific knowledge" (883)
32. TI ( fitness W3 practise) OR AB (fitness W3 practise) (180)
33. TI (fitness W3 purpose) OR AB (fitness W3 purpose) (67)
34. TI (defin\* W3 practi\*) OR AB (defin\* W3 practi\*) (906)
35. TI (asses\* W3 prepar\*) OR AB(asses\* W3 prepar\*) (405)
36. TI (toler\* W3 uncert\*) OR AB (toler\* W3 uncert\*) (42)
37. TI "Leadership" OR AB "Leadership" (17773)
38. TI "Ethical manner" OR AB " Ethical manner" (37)
39. TI "Clinical analysis" OR AB "Clinical analysis" (230)
40. TI "Clinical\* effective\*" OR AB "Clinical\* effective\*" (2310)
41. TI "Communicate effectively" OR AB "Communicate effectively" (262)
42. TI (\*"Communication") OR AB (\*"Communication") (43123)
43. TI "Communicate appropriately" OR AB "Communicate appropriately" (1)
44. TI "Clinical responsibil\*" OR AB "Clinical responsibil\*" (94)
45. TI (Adapt W3 chang\*) OR AB (Adapt W3 chang\*) (340)
46. TI "Patient safety" OR AB "Patient safety" (10414)
47. TI "\*Patient Safety" OR AB "\*Patient Safety" (10414)
48. TI "Clinical judgement" OR AB "Clinical judgement" (350)
49. TI "Patient care" OR AB "Patient care" (19170)
50. TX "\*Quality Assurance, Health Care" (36)
51. TI "Quality assurance" OR AB "Quality assurance" (4020)
52. TX CPD OR "Continuing professional development" (5800)
53. TX (Inadequate W3 (supervision or train\* OR support OR preparedness)) (3750)

54. TX ((Inadequate OR clinical) W3 (supervision OR train\* OR support OR preparedness)) (28272)
55. TI "clinical performance" OR AB "clinical performance" (1383)
56. TI (Situation W3 uncertainty) OR AB (Situation W3 uncertainty)(22)
57. TI (Emergency W3 judgement) OR AB (Emergency W3 judgement) (1)
58. TI "Safe prescribing" OR AB "Safe prescribing" (95)
59. TI "Reflection" OR AB "Reflection" (7641)
60. TX "Feedback" (75211)
61. TI (Work W3 autonomously) OR AB (Work W3 autonomously) (14)
62. TI (Assistantship OR Mentoring) OR AB (Assistantship OR Mentoring) (3235)
63. TX "psychology knowledge" (11)
64. (MH "Psychology, Occupational") (439)
65. S10 OR S11 OR S12 OR S13 OR S14 OR S15 OR S16 OR S17 OR S18 OR S19 OR S20 OR S21 OR S22 OR S23 OR S24 OR S25 OR S26 OR S27 OR S28 OR S29 OR S30 OR S31 OR S32 OR S33 OR S34 OR S35 OR S36 OR S37 OR S38 OR S39 OR S40 OR S41 OR S42 OR S43 OR S44 OR S45 OR S46 OR S47 OR S48 OR S49 OR S50 OR S51 OR S52 OR S53 OR S54 OR S55 OR S56 OR S57 OR S58 OR S59 OR S60 OR S61 OR S62 OR S63 OR S64 (545500)
66. (MH "Great Britain+") (77696)
67. (MH "Scotland") (12716)
68. (MH "Northern Ireland") (2739)
69. (MH "Wales") (6239)
70. TI ( ("Great Britain" OR Britain OR England OR Scotland OR Wales OR Ireland OR UK OR "United Kingdom" OR welsh OR english OR scottish OR irish) ) OR AB ( ("Great Britain" OR Britain OR England OR Scotland OR Wales OR Ireland OR UK OR "United Kingdom" OR welsh OR english OR scottish OR irish) ) (80206)
71. S66 OR S67 OR S68 OR S69 OR S70 (138861)
72. S9 AND S65 AND S71 (47)

## Database: Ovid EMBASE(R) 1947-Present

Search Strategy: 06.05.2014 LJG

- 
- 1 Junior doctor\*1.mp. (2476)
  - 2 pre-registration house officer.tw. (65)
  - 3 (foundation doctor\* or F1 or FY1 or F2 or FY2 or foundation year 1 or foundation year one or foundation year 2 or foundation year two).tw. (48839)
  - 4 (PRHO\* or houseman\* or house man\* or house officer\* or intern).tw. (4303)
  - 5 new\* qualif\* doctor\*.tw. (148)
  - 6 (SHO or senior house officer\*).tw. (1465)
  - 7 (medic\* adj3 graduat\*).tw. (9249)
  - 8 "Internship and Residency"/ (180644)
  - 9 or/1-8 (238589)
  - 10 exp Professional Competence/ (23677)
  - 11 exp Clinical Competence/ (42143)
  - 12 exp Self Efficacy/ (136749)
  - 13 (Confidence adj3 practice).tw. (341)
  - 14 exp Professional Practice/ (272344)
  - 15 exp Resilience, Psychological/ (36889)
  - 16 exp coping behavior/ (36889)
  - 17 exp Competency-Based Education/ (62398)
  - 18 \*"Education, Medical, Graduate"/ (98906)
  - 19 \*"Education, Medical"/ (98906)
  - 20 "Education, Medical, Continuing"/ (180644)

21 (prepar\* adj3 practi\*).tw. (3439)  
 22 ((readiness or ready) adj3 practi\*).tw. (357)  
 23 (transition\* adj3 pract\*).tw. (719)  
 24 ((Competence or prepare\* or confiden\* or ready) adj3 (practise or purpose or employab\*).tw. (637)  
 25 (resilien\* adj3 medical).tw. (21)  
 26 (effective\* adj3 medical curriculum).tw. (4)  
 27 foundation train\*.tw. (104)  
 28 medical education.tw. (32012)  
 29 professionalism.tw. (5300)  
 30 prescribing skill\*1.tw. (86)  
 31 scientific knowledge.tw. (4260)  
 32 (fitness adj3 practise).tw. (134)  
 33 (fitness adj3 purpose).tw. (253)  
 34 (defin\* adj3 practi\*).tw. (3494)  
 35 (asses\* adj3 prepar\*).tw. (2814)  
 36 (toler\* adj3 uncert\*).tw. (221)  
 37 Leadership.tw. (24025)  
 38 Ethical manner.tw. (71)  
 39 Clinical analysis.tw. (7764)  
 40 Clinical\* effective\*.tw. (13804)  
 41 Communicate effectively.tw. (543)  
 42 \*"Communication"/ (37059)  
 43 Communicate appropriately.tw. (8)  
 44 Clinical responsibil\*.tw. (380)  
 45 (Adapt adj3 chang\*).tw. (2251)  
 46 Patient safety.tw. (18628)  
 47 \*Patient Safety/ (5694)  
 48 Clinical judgement.tw. (1917)  
 49 Patient care.tw. (50138)  
 50 \*Quality Assurance, Health Care/ (60714)  
 51 Quality assurance.tw. (24449)  
 52 (CPD or Continuing professional development).tw. (5720)  
 53 (Inadequate adj3 (supervision or train\* or support or preparedness)).tw. (2224)  
 54 ((Inadequate or clinical) adj3 (supervision or train\* or support or preparedness)).tw. (26515)  
 55 clinical performance.tw. (6184)  
 56 (Situation adj3 uncertainty).tw. (83)  
 57 (Emergency adj3 judgement).tw. (7)  
 58 Safe prescribing.tw. (201)  
 59 Reflection.tw. (39746)  
 60 "Feedback"/ (58578)  
 61 (Work adj3 autonomously).tw. (33)  
 62 (Assistantship or Mentoring).tw. (4114)  
 63 psychology knowledge.mp. (6)  
 64 Psychology/ (48268)  
 65 or/10-64 (1042319)  
 66 exp Great Britain/ (336473)  
 67 exp Scotland/ (336473)  
 68 exp Northern Ireland/ (336473)  
 69 exp Wales/ (336473)  
 70 (Great Britain or Britain or England or Scotland or Wales or Ireland or UK or United Kingdom or welsh or english or scottish or irish).tw. (475954)  
 71 or/66-70 (685221)  
 72 9 and 65 and 71 (15373)  
 73 limit 72 to yr="2013 -Current" (64)

## Database: ERIC

---

1. AB,TI(Junior doctor\*1) (954)
2. AB,TI(pre-registration house officer) (2)
3. AB,TI(("foundation doctor\*" OR F1 OR FY1 OR F2 OR FY2 OR "foundation year 1" OR "foundation year one" OR "foundation year 2" OR "foundation year two")) (5495)
4. AB,TI(PRHO\* OR "houseman\*" OR "house man\*" OR "house officer\*" OR intern) (7965)
5. AB,TI(new\* qualif\* doctor\*) (474)
6. AB,TI(SHO OR "senior house officer\*") (982)
7. AB,TI(medic\* NEAR/3 graduat\*) (2343)
8. AB,TI(Internship and Residency) (141)
9. 1 OR 2 OR 3 OR 4 OR 5 OR 6 OR 7 OR 8 (17694)
10. SU.EXACT.EXPLODE("Professional Competence") (897)
11. SU.EXACT.EXPLODE("Clinical Competence") (369)
12. SU.EXACT.EXPLODE("Self Efficacy") (10280)
13. AB,TI((Confidence NEAR/3 practice)) (502)
14. Professional AND Practice (635593)
15. SU.EXACT.EXPLODE("Resilience (Psychology)") (1076)
16. SU.EXACT.EXPLODE(Coping) (59278)
17. SU.EXACT.EXPLODE("Competency Based Education") (15661)
18. AB,TI(\*Education, Medical, Graduate) (1730)
19. AB,TI(\*Education, Medical) (24162)
20. AB,TI(Education, Medical, Continuing) (1966)
21. AB,TI((prepar\* NEAR/3 practi\*)) (5186)
22. AB,TI readiness OR ready NEAR/3 practi\* (8491)
23. AB,TI((transition\* NEAR/3 pract\*)) (1991)
24. AB,TI((Competence OR prepare\* OR confiden\* OR ready) NEAR/3 (practise OR purpose OR employab\*)) (4292)
25. AB,TI((resilien\* NEAR/3 medical)) (28)
26. AB,TI(effective\* NEAR/3 "medical curriculum") (2)
27. AB,TI("foundation train\*") (77)
28. AB,TI("medical education") (7589)
29. AB,TI("professionalism") (16620)
30. AB,TI("prescribing skill\*") (9)
31. AB,TI("scientific knowledge") (7688)
32. AB,TI(fitness NEAR/3 practise) (366)
33. AB,TI(fitness NEAR/3 purpose) (364)
34. ("defin\*" NEAR/3 "practi\*") (27872)
35. ("asses\*" NEAR/3 "prepar\*") (8065)
36. AB,TI(toler\* NEAR/3 uncert\*) (315)
37. "Leadership" (822513)
38. "Ethical manner" (1702)
39. "Clinical analysis" (623)
40. "Clinical\* effective\*" (4568)
41. ("Communicate effectively") (8216)
42. "\*Communication" (1425140)
43. "Communicate appropriately" (136)
44. "Clinical responsibil\*" (362)
45. Adapt NEAR/3 chang\* (33273)
46. "\*Patient Safety" (16302)
47. "Clinical judgement" (663)
48. "Patient care" (50466)
49. "\*Quality Assurance", "Health Care" (9435)
50. "Quality assurance" (70852)

51. CPD OR "Continuing professional development" (17447)
52. AB,TI (Inadequate NEAR/3 (supervision or train\* or support or preparedness))(86)
53. (Inadequate OR clinical) NEAR/3 (supervision OR train\* OR support OR preparedness) (33272)
54. "clinical performance" (2268)
55. Situation NEAR/3 uncertainty (6776)
56. Emergency OR judgement (1356587)
57. Safe prescribing (6719)
58. Reflection (656099)
59. "Feedback" (349919)
60. Work NEAR/3 autonomously (746)
61. Assistantship OR Mentoring (57680)
62. "psychology knowledge" (129)
63. Psychology (905693)
64. 10 OR 11 OR 12 OR 13 OR 14 OR 15 OR 16 OR 17 OR 18 OR 19 OR 20 OR 21 OR 22 OR 23 OR 24 OR 25 OR 26 OR 27 OR 28 OR 29 OR 30 OR 31 OR 32 OR 33 OR 34 OR 35 OR 36 OR 37 OR 38 OR 39 OR 40 OR 41 OR 42 OR 43 OR 44 OR 45 OR 46 OR 47 OR 48 OR 49 OR 50 OR 51 OR 51 OR 52 OR 53 OR 53 OR 54 OR 55 OR 56 OR 57 OR 58 OR 59 OR 60 OR 61 OR 62 OR 63 (4347109)
65. "Great Britain" (1671223)
66. "Scotland" (696621)
67. "Northern Ireland" (74072)
68. "Wales" (528864)
69. AB,TI(Great Britain OR Britain OR England OR Scotland OR Wales OR Ireland OR UK OR United Kingdom OR welsh OR english OR scottish OR irish) (1661384)
70. 65 OR 66 OR 67 OR 68 OR 69 (3942223)
71. 9 AND 64 AND 70 (43)

## Database: HMIC Health Management Information Consortium

Search Strategy:

- 
- 1 Junior doctor\*1.mp. (939)
  - 2 pre-registration house officer.tw. (22)
  - 3 (foundation doctor\* or F1 or FY1 or F2 or FY2 or foundation year 1 or foundation year one or foundation year 2 or foundation year two).tw. (59)
  - 4 (PRHO\* or houseman\* or house man\* or house officer\* or intern).tw. (454)
  - 5 new\* qualif\* doctor\*.tw. (35)
  - 6 (SHO or senior house officer\*).tw. (273)
  - 7 (medic\* adj3 graduat\*).tw. (273)
  - 8 "Internship and Residency"/ (0)
  - 9 or/1-8 (1622)
  - 10 exp Professional Competence/ (563)
  - 11 exp Clinical Competence/ (0)
  - 12 exp Self Efficacy/ (0)
  - 13 (Confidence adj3 practice).tw. (34)
  - 14 exp Professional Practice/ (15582)
  - 15 exp Resilience, Psychological/ (0)
  - 16 exp coping behavior/ (0)
  - 17 exp Competence based education/ (0)
  - 18 \*"Education, Medical, Graduate"/ (0)
  - 19 \*"Education, Medical"/ (0)
  - 20 "Education, Medical, Continuing"/ (0)
  - 21 (prepar\* adj3 practi\*).tw. (260)



22 ((readiness or ready) adj3 practi\*).tw. (27)  
 23 (transition\* adj3 pract\*).tw. (42)  
 24 ((Competence or prepare\* or confiden\* or ready) adj3 (practise or purpose or employab\*)).tw. (29)  
 25 (resilien\* adj3 medical).tw. (4)  
 26 (effective\* adj3 medical curriculum).tw. (0)  
 27 foundation train\*.tw. (20)  
 28 medical education.tw. (1347)  
 29 professionalism.tw. (476)  
 30 prescribing skill\*1.tw. (4)  
 31 scientific knowledge.tw. (106)  
 32 (fitness adj3 practise).tw. (79)  
 33 (fitness adj3 purpose).tw. (49)  
 34 (defin\* adj3 practi\*).tw. (250)  
 35 (asses\* adj3 prepar\*).tw. (93)  
 36 (toler\* adj3 uncert\*).tw. (8)  
 37 Leadership.tw. (3668)  
 38 Ethical manner.tw. (6)  
 39 Clinical analysis.tw. (10)  
 40 Clinical\* effective\*.tw. (1115)  
 41 Communicate effectively.tw. (45)  
 42 "Communication"/ (0)  
 43 Communicate appropriately.tw. (1)  
 44 Clinical responsibil\*.tw. (59)  
 45 (Adapt adj3 chang\*).tw. (84)  
 46 Patient safety.tw. (1860)  
 47 exp Patient Safety/ (0)  
 48 Clinical judgement.tw. (157)  
 49 Patient care.tw. (5089)  
 50 exp Quality assurance in health services/ (0)  
 51 Quality assurance.tw. (2772)  
 52 (CPD or Continuing professional development).tw. (476)  
 53 (Inadequate adj3 (supervision or train\* or support or preparedness)).tw. (199)  
 54 ((Inadequate or clinical) adj3 (supervision or train\* or support or preparedness)).tw. (1529)  
 55 clinical performance.tw. (206)  
 56 (Situation adj3 uncertainty).tw. (2)  
 57 (Emergency adj3 judgement).tw. (0)  
 58 Safe prescribing.tw. (5)  
 59 Reflection.tw. (805)  
 60 "Feedback"/ (161)  
 61 (Work adj3 autonomously).tw. (9)  
 62 (Assistantship or Mentoring).tw. (266)  
 63 psychology knowledge.mp. (1)  
 64 Psychology/ (364)  
 65 or/10-64 (33640)  
 66 exp Great Britain/ (446)  
 67 exp Scotland/ (5156)  
 68 exp Northern Ireland/ (1405)  
 69 exp Wales/ (3676)  
 70 (Great Britain or Britain or England or Scotland or Wales or Ireland or UK or United Kingdom or welsh or english or scottish or irish).tw. (53492)  
 71 or/66-70 (56659)  
 72 9 and 65 and 71 (124)  
 73 limit 72 to yr="2013 -Current" (11)

## Database: Ovid MEDLINE(R) 1946 to April Week 4 2014

Search Strategy: 06.05.2014 LJG

- 
- 1 Junior doctor\*1.mp. (1549)
  - 2 pre-registration house officer.tw. (55)
  - 3 (foundation doctor\* or F1 or FY1 or F2 or FY2 or foundation year 1 or foundation year one or foundation year 2 or foundation year two).tw. (39891)
  - 4 (PRHO\* or houseman\* or house man\* or house officer\* or intern).tw. (2837)
  - 5 new\* qualif\* doctor\*.tw. (103)
  - 6 (SHO or senior house officer\*).tw. (993)
  - 7 (medic\* adj3 graduat\*).tw. (7205)
  - 8 "Internship and Residency"/ (34671)
  - 9 or/1-8 (82493)
  - 10 exp Professional Competence/ (83895)
  - 11 exp Clinical Competence/ (64430)
  - 12 exp Self Efficacy/ (11765)
  - 13 (Confidence adj3 practice).tw. (233)
  - 14 exp Professional Practice/ (216900)
  - 15 exp Resilience, Psychological/ (1438)
  - 16 exp coping behavior/ (101559)
  - 17 exp Competency-Based Education/ (2735)
  - 18 \*"Education, Medical, Graduate"/ (14646)
  - 19 \*"Education, Medical"/ (34727)
  - 20 "Education, Medical, Continuing"/ (20956)
  - 21 (prepar\* adj3 practi\*).tw. (2438)
  - 22 ((readiness or ready) adj3 practi\*).tw. (263)
  - 23 (transition\* adj3 pract\*).tw. (524)
  - 24 ((Competence or prepare\* or confiden\* or ready) adj3 (practise or purpose or employab\*).tw. (368)
  - 25 (resilien\* adj3 medical).tw. (15)
  - 26 (effective\* adj3 medical curriculum).tw. (3)
  - 27 foundation train\*.tw. (47)
  - 28 medical education.tw. (24600)
  - 29 professionalism.tw. (4154)
  - 30 prescribing skill\*1.tw. (52)
  - 31 scientific knowledge.tw. (2965)
  - 32 (fitness adj3 practise).tw. (84)
  - 33 (fitness adj3 purpose).tw. (158)
  - 34 (defin\* adj3 practi\*).tw. (2423)
  - 35 (asses\* adj3 prepar\*).tw. (1945)
  - 36 (toler\* adj3 uncert\*).tw. (172)
  - 37 Leadership.tw. (18973)
  - 38 Ethical manner.tw. (52)
  - 39 Clinical analysis.tw. (5065)
  - 40 Clinical\* effective\*.tw. (9576)
  - 41 Communicate effectively.tw. (398)
  - 42 \*"Communication"/ (26490)
  - 43 Communicate appropriately.tw. (5)
  - 44 Clinical responsibil\*.tw. (267)
  - 45 (Adapt adj3 chang\*).tw. (1757)
  - 46 Patient safety.tw. (12343)
  - 47 \*Patient Safety/ (2456)
  - 48 Clinical judgement.tw. (1261)
  - 49 Patient care.tw. (35541)
  - 50 \*Quality Assurance, Health Care/ (27790)

51 Quality assurance.tw. (17239)  
 52 (CPD or Continuing professional development).tw. (3838)  
 53 (Inadequate adj3 (supervision or train\* or support or preparedness)).tw. (1597)  
 54 ((Inadequate or clinical) adj3 (supervision or train\* or support or preparedness)).tw. (18433)  
 55 clinical performance.tw. (4921)  
 56 (Situation adj3 uncertainty).tw. (54)  
 57 (Emergency adj3 judgement).tw. (9)  
 58 Safe prescribing.tw. (105)  
 59 Reflection.tw. (27461)  
 60 "Feedback"/ (26406)  
 61 (Work adj3 autonomously).tw. (19)  
 62 (Assistantship or Mentoring).tw. (3153)  
 63 psychology knowledge.mp. (4)  
 64 Psychology/ (20375)  
 65 or/10-64 (691572)  
 66 exp Great Britain/ (300335)  
 67 exp Scotland/ (21051)  
 68 exp Northern Ireland/ (3890)  
 69 exp Wales/ (11889)  
 70 (Great Britain or Britain or England or Scotland or Wales or Ireland or UK or United Kingdom or welsh or english or scottish or irish).tw. (236538)  
 71 or/66-70 (454501)  
 72 9 and 65 and 71 (1520)  
 73 limit 72 to yr="2013 -Current" (98)

## Database: Ovid MEDLINE In progress

Search Strategy: 06.05.2014 IJG

-----

1 Junior doctor\*1.mp. (169)  
 2 pre-registration house officer.tw. (1)  
 3 (foundation doctor\* or F1 or FY1 or F2 or FY2 or foundation year 1 or foundation year one or foundation year 2 or foundation year two).tw. (2958)  
 4 (PRHO\* or houseman\* or house man\* or house officer\* or intern).tw. (181)  
 5 new\* qualif\* doctor\*.tw. (11)  
 6 (SHO or senior house officer\*).tw. (49)  
 7 (medic\* adj3 graduat\*).tw. (844)  
 8 "Internship and Residency"/ (1)  
 9 or/1-8 (49)  
 10 exp Professional Competence/ (4143)  
 11 exp Clinical Competence/ (0)  
 12 exp Self Efficacy/ (0)  
 13 (Confidence adj3 practice).tw. (0)  
 14 exp Professional Practice/ (29)  
 15 exp Resilience, Psychological/ (1)  
 16 exp coping behavior/ (0)  
 17 exp Competency-Based Education/ (1)  
 18 \*"Education, Medical, Graduate"/ (0)  
 19 \*"Education, Medical"/ (1)  
 20 "Education, Medical, Continuing"/ (0)  
 21 (prepar\* adj3 practi\*).tw. (238)  
 22 ((readiness or ready) adj3 practi\*).tw. (25)  
 23 (transition\* adj3 pract\*).tw. (70)  
 24 ((Competence or prepare\* or confiden\* or ready) adj3 (practise or purpose or employab\*)).tw. (45)

25 (resilien\* adj3 medical).tw. (5)  
 26 (effective\* adj3 medical curriculum).tw. (1)  
 27 foundation train\*.tw. (10)  
 28 medical education.tw. (2354)  
 29 professionalism.tw. (345)  
 30 prescribing skill\*1.tw. (10)  
 31 scientific knowledge.tw. (302)  
 32 (fitness adj3 practise).tw. (15)  
 33 (fitness adj3 purpose).tw. (25)  
 34 (defin\* adj3 practi\*).tw. (207)  
 35 (asses\* adj3 prepar\*).tw. (172)  
 36 (toler\* adj3 uncert\*).tw. (23)  
 37 Leadership.tw. (1590)  
 38 Ethical manner.tw. (6)  
 39 Clinical analysis.tw. (379)  
 40 Clinical\* effective\*.tw. (776)  
 41 Communicate effectively.tw. (34)  
 42 \*"Communication"/ (0)  
 43 Communicate appropriately.tw. (0)  
 44 Clinical responsibil\*.tw. (16)  
 45 (Adapt adj3 chang\*).tw. (209)  
 46 Patient safety.tw. (1577)  
 47 \*Patient Safety/ (0)  
 48 Clinical judgement.tw. (70)  
 49 Patient care.tw. (2793)  
 50 \*Quality Assurance, Health Care/ (0)  
 51 Quality assurance.tw. (1052)  
 52 (CPD or Continuing professional development).tw. (285)  
 53 (Inadequate adj3 (supervision or train\* or support or preparedness)).tw. (150)  
 54 ((Inadequate or clinical) adj3 (supervision or train\* or support or preparedness)).tw. (1718)  
 55 clinical performance.tw. (389)  
 56 (Situation adj3 uncertainty).tw. (5)  
 57 (Emergency adj3 judgement).tw. (0)  
 58 Safe prescribing.tw. (16)  
 59 Reflection.tw. (8669)  
 60 "Feedback"/ (0)  
 61 (Work adj3 autonomously).tw. (2)  
 62 (Assistantship or Mentoring).tw. (312)  
 63 psychology knowledge.mp. (0)  
 64 Psychology/ (0)  
 65 or/10-64 (22503)  
 66 exp Great Britain/ (0)  
 67 exp Scotland/ (0)  
 68 exp Northern Ireland/ (0)  
 69 exp Wales/ (0)  
 70 (Great Britain or Britain or England or Scotland or Wales or Ireland or UK or United Kingdom or welsh or english or scottish or irish).tw. (25832)  
 71 or/66-70 (25832)  
 72 9 and 65 and 71 (47)  
 73 limit 72 to yr="2013 -Current" (0)

**Database: Ovid Ovid MEDLINE(R) without Revisions 1996 to April Week 4 2014**

Search Strategy: 06.05.2014 LJG

---

- 1 Junior doctor\*1.mp. (1257)
- 2 pre-registration house officer.tw. (44)
- 3 (foundation doctor\* or F1 or FY1 or F2 or FY2 or foundation year 1 or foundation year one or foundation year 2 or foundation year two).tw. (18567)
- 4 (PRHO\* or houseman\* or house man\* or house officer\* or intern).tw. (1692)
- 5 new\* qualif\* doctor\*.tw. (87)
- 6 (SHO or senior house officer\*).tw. (750)
- 7 (medic\* adj3 graduat\*).tw. (4874)
- 8 "Internship and Residency"/ (21468)
- 9 or/1-8 (45403)
- 10 exp Professional Competence/ (67836)
- 11 exp Clinical Competence/ (52286)
- 12 exp Self Efficacy/ (206)
- 13 (Confidence adj3 practice).tw. (107159)
- 14 exp Professional Practice/ (1384)
- 15 exp Resilience, Psychological/ (64664)
- 16 exp coping behavior/ (2309)
- 17 exp Competency-Based Education/ (8759)
- 18 \*"Education, Medical, Graduate"/ (13520)
- 19 \*"Education, Medical"/ (12122)
- 20 "Education, Medical, Continuing"/ (1758)
- 21 (prepar\* adj3 practi\*).tw. (214)
- 22 ((readiness or ready) adj3 practi\*).tw. (447)
- 23 (transition\* adj3 pract\*).tw. (291)
- 24 ((Competence or prepare\* or confiden\* or ready) adj3 (practise or purpose or employab\*).tw. (15)
- 25 (resilien\* adj3 medical).tw. (3)
- 26 (effective\* adj3 medical curriculum).tw. (46)
- 27 foundation train\*.tw. (14611)
- 28 medical education.tw. (3303)
- 29 professionalism.tw. (48)
- 30 prescribing skill\*1.tw. (2387)
- 31 scientific knowledge.tw. (82)
- 32 (fitness adj3 practise).tw. (147)
- 33 (fitness adj3 purpose).tw. (1898)
- 34 (defin\* adj3 practi\*).tw. (1381)
- 35 (asses\* adj3 prepar\*).tw. (133)
- 36 (toler\* adj3 uncert\*).tw. (14346)
- 37 Leadership.tw. (45)
- 38 Ethical manner.tw. (2888)
- 39 Clinical analysis.tw. (7088)
- 40 Clinical\* effective\*.tw. (313)
- 41 Communicate effectively.tw. (16021)
- 42 \*"Communication"/ (3)
- 43 Communicate appropriately.tw. (162)
- 44 Clinical responsibil\*.tw. (1462)
- 45 (Adapt adj3 chang\*).tw. (11742)
- 46 Patient safety.tw. (2401)
- 47 \*Patient Safety/ (845)
- 48 Clinical judgement.tw. (25210)

- 49 Patient care.tw. (19143)
- 50 \*Quality Assurance, Health Care/ (11054)
- 51 Quality assurance.tw. (2980)
- 52 (CPD or Continuing professional development).tw. (1211)
- 53 (Inadequate adj3 (supervision or train\* or support or preparedness)).tw. (14003)
- 54 ((Inadequate or clinical) adj3 (supervision or train\* or support or preparedness)).tw. (3823)
- 55 clinical performance.tw. (39)
- 56 (Situation adj3 uncertainty).tw. (6)
- 57 (Emergency adj3 judgement).tw. (92)
- 58 Safe prescribing.tw. (19332)
- 59 Reflection.tw. (12697)
- 60 "Feedback"/ (16)
- 61 (Work adj3 autonomously).tw. (2866)
- 62 (Assistantship or Mentoring).tw. (2)
- 63 psychology knowledge.mp. (7812)
- 64 Psychology/ (418523)
- 65 or/10-64 (168389)
- 66 exp Great Britain/ (168389)
- 67 exp Scotland/ (10901)
- 68 exp Northern Ireland/ (2156)
- 69 exp Wales/ (6239)
- 70 (Great Britain or Britain or England or Scotland or Wales or Ireland or UK or United Kingdom or welsh or english or scottish or irish).tw. (186068)
- 71 or/66-70 (294704)
- 72 9 and 65 and 71 (1193)
- 73 limit 72 to yr="2013 -Current" (93)

## Database: PsycINFO 1806 to April Week 5 2014

Search Strategy:

- 
- 1 Junior doctor\*1.mp. (311)
  - 2 pre-registration house officer.tw. (15)
  - 3 (foundation doctor\* or F1 or FY1 or F2 or FY2 or foundation year 1 or foundation year one or foundation year 2 or foundation year two).tw. (2313)
  - 4 (PRHO\* or houseman\* or house man\* or house officer\* or intern).tw. (1151)
  - 5 new\* qualif\* doctor\*.tw. (25)
  - 6 (SHO or senior house officer\*).tw. (159)
  - 7 (medic\* adj3 graduat\*).tw. (1692)
  - 8 "Internship and Residency"/ (0)
  - 9 or/1-8 (5442)
  - 10 exp Professional Competence/ (4655)
  - 11 exp Clinical Competence/ (0)
  - 12 exp Self Efficacy/ (14655)
  - 13 (Confidence adj3 practice).tw. (165)
  - 14 exp Professional Practice/ (0)
  - 15 exp Resilience, Psychological/ (6649)
  - 16 exp coping behavior/ (37294)
  - 17 exp Competence based learning/ (0)
  - 18 \*"Education, Medical, Graduate"/ (0)
  - 19 \*"Education, Medical"/ (0)
  - 20 "Education, Medical, Continuing"/ (0)
  - 21 (prepar\* adj3 practi\*).tw. (1380)
  - 22 ((readiness or ready) adj3 practi\*).tw. (203)

23 (transition\* adj3 pract\*).tw. (555)  
 24 ((Competence or prepare\* or confiden\* or ready) adj3 (practise or purpose or employab\*)).tw. (194)  
 25 (resilien\* adj3 medical).tw. (16)  
 26 (effective\* adj3 medical curriculum).tw. (3)  
 27 foundation train\*.tw. (23)  
 28 medical education.tw. (6965)  
 29 professionalism.tw. (3093)  
 30 prescribing skill\*1.tw. (7)  
 31 scientific knowledge.tw. (2791)  
 32 (fitness adj3 practise).tw. (23)  
 33 (fitness adj3 purpose).tw. (54)  
 34 (defin\* adj3 practi\*).tw. (1631)  
 35 (asses\* adj3 prepar\*).tw. (568)  
 36 (toler\* adj3 uncert\*).tw. (223)  
 37 Leadership.tw. (40701)  
 38 Ethical manner.tw. (79)  
 39 Clinical analysis.tw. (465)  
 40 Clinical\* effective\*.tw. (1517)  
 41 Communicate effectively.tw. (410)  
 42 "Communication"/ (12660)  
 43 Communicate appropriately.tw. (10)  
 44 Clinical responsibil\*.tw. (129)  
 45 (Adapt adj3 chang\*).tw. (851)  
 46 Patient safety.tw. (1613)  
 47 exp Patient Safety/ (0)  
 48 Clinical judgement.tw. (251)  
 49 Patient care.tw. (6574)  
 50 exp Quality assurance in health services/ (0)  
 51 Quality assurance.tw. (1830)  
 52 (CPD or Continuing professional development).tw. (982)  
 53 (Inadequate adj3 (supervision or train\* or support or preparedness)).tw. (907)  
 54 ((Inadequate or clinical) adj3 (supervision or train\* or support or preparedness)).tw. (10407)  
 55 clinical performance.tw. (472)  
 56 (Situation adj3 uncertainty).tw. (80)  
 57 (Emergency adj3 judgement).tw. (0)  
 58 Safe prescribing.tw. (21)  
 59 Reflection.tw. (21411)  
 60 "Feedback"/ (12544)  
 61 (Work adj3 autonomously).tw. (14)  
 62 (Assistantship or Mentoring).tw. (6048)  
 63 psychology knowledge.mp. (84)  
 64 Psychology/ (26959)  
 65 or/10-64 (213638)  
 66 exp Great Britain/ (0)  
 67 exp Scotland/ (0)  
 68 exp Northern Ireland/ (0)  
 69 exp Wales/ (0)  
 70 (Great Britain or Britain or England or Scotland or Wales or Ireland or UK or United Kingdom or welsh or english or scottish or irish).tw. (176578)  
 71 or/66-70 (176578)  
 72 9 and 65 and 71 (115)  
 73 limit 72 to yr="2013 -Current" (15)

## SCOPUS SEARCH

### 203 RESULTS

1. "Junior doctor\*" [ALL] **9390**
2. "pre-registration house officer" [ABS, TITLE, KEYWORD] **177**
3. "foundation doctor\*" or "F1 W/3 doctor" or "FY1 W/3 doctor" or "F2 W/3 doctor" or "FY2 W/3 doctor" or "foundation year 1" or "foundation year one" or "foundation year 2" or "foundation year two" [ABS, TITLE, KEYWORD] **134**
4. ("PRHO\*" or "houseman\*" or "house man\*" or "house officer\*" or "intern") [ABS, TITLE, KEYWORD] **2498**
5. new\* qualif\* doctor\*[ABS, TITLE, KEYWORD] **725**
6. ("SHO" or "senior house officer\*") [ABS, TITLE, KEYWORD] **747**
7. (medic\* W/3 graduat\*) [ABS, TITLE, KEYWORD] **31943**
8. "Internship and Residency" [ALL] **33997**
9. #1 OR #2 etc (can only search a certain amount of characters, need to add in fields) **68726**
10. "Professional Competence" [ALL] **102101**
11. "Clinical Competence" [ALL] **194097**
12. "Self Efficacy" [ALL] **290294**
13. (Confidence W/3 practice) [ABS, TITLE, KEYWORD] **1,577**
14. "Professional Practice" [ALL] **524744**
15. "Resilience, Psychological" [ALL] **33991**
16. "coping behavi?r" [ALL] **183890**
17. "Competency-Based Education" [ALL] **9369**
18. \*"Education, Medical, Graduate" [ALL] **21129**
19. \*"Education, Medical" [ALL] **161417**
20. "Education, Medical, Continuing" [ALL] **20434**
21. (prepar\* W/3 practi\*)[ABS, TITLE, KEYWORD] **26739**
22. ((readiness or ready) W/3 practi\*) [ABS, TITLE, KEYWORD] **3245**
23. (transition\* W/3 pract\*)[ABS, TITLE, KEYWORD] **9748**
24. ((Competence or prepare\* or confiden\* or ready) W/3 (practise or purpose or employab\*)) [ABS, TITLE, KEYWORD] **2947**
25. (resilien\* W/3 medical) [ABS, TITLE, KEYWORD] **369**
26. (effective\* W/3 medical curriculum) [ABS, TITLE, KEYWORD] **2241**
27. "foundation train\*" [ABS, TITLE, KEYWORD] **131572**
28. "medical education" [ABS, TITLE, KEYWORD] **943,650**
29. professionalism [ABS, TITLE, KEYWORD] **12520**
30. "prescribing skill\*" [ABS, TITLE, KEYWORD] **796**
31. "scientific knowledge" [ABS, TITLE, KEYWORD] **48823**
32. (fitness W/3 practise) [ABS, TITLE, KEYWORD] **143**
33. (fitness W/3 purpose) [ABS, TITLE, KEYWORD] **1,165**
33. (defin\* W/3 practi\*) [ABS, TITLE, KEYWORD] **9281**
35. (asses\* W/3 prepar\*) [ABS, TITLE, KEYWORD] **26414**
36. (toler\* W/3 uncert\*) [ABS, TITLE, KEYWORD] **1460**
37. Leadership [ABS, TITLE, KEYWORD] **97738**
38. "Ethical manner" [ABS, TITLE, KEYWORD] **1715**
39. "Clinical analysis" [ABS, TITLE, KEYWORD] **1800616**
40. "Clinical\* effective\*" [ABS, TITLE, KEYWORD] **668111**
41. "Communicate effectively" [ABS, TITLE, KEYWORD] **3949**
42. "Communication" [ALL] **1,229,380**
43. "Communicate appropriately" [ABS, TITLE, KEYWORD] **323**
44. "Clinical responsibil\*" [ABS, TITLE, KEYWORD] **21895**
45. (Adapt W/3 chang\*) [ABS, TITLE, KEYWORD] **11189**
46. "Patient safety" [ABS, TITLE, KEYWORD] **316241**
47. "Patient Safety" [ALL] **890613**



- 48 "Clinical judgement"[ABS, TITLE, KEYWORD] **92868**
- 49 "Patient care"[ABS, TITLE, KEYWORD] **1216229**
- 50 "Quality assurance in health services" [ABS, TITLE, KEYWORD] **19320**
- 51 "Quality assurance" [ABS, TITLE, KEYWORD] **130270**
- 52 (CPD or "Continuing professional development") [ABS, TITLE, KEYWORD] **8572**
- 53 (Inadequate W/3 (supervision or train\* or support or preparedness)) [ABS, TITLE, KEYWORD] **3495**
- 54 ((Inadequate or clinical) W/3 (supervision or train\* or support or preparedness)) [ABS, TITLE, KEYWORD] **47728**
- 55 "clinical performance"[ABS, TITLE, KEYWORD] **276579**
- 56 (Situation W/3 uncertainty) [ABS, TITLE, KEYWORD] **1324**
- 57 (Emergency W/3 judgement) [ABS, TITLE, KEYWORD] **116**
- 58 "Safe prescribing" [ABS, TITLE, KEYWORD] **1596**
- 59 Reflection[ABS, TITLE, KEYWORD] **360327**
- 60 "Feedback" [ALL] **798956**
- 61 (Work W/3 autonomously) [ABS, TITLE, KEYWORD] **245**
- 62 (Assistantship or Mentoring) [ABS, TITLE, KEYWORD] **9604**
- 63 "psychology knowledge" [ABS, TITLE, KEYWORD] **25111**
- 64 Psychology [ALL] 1,781,286
- 65 #10-64 (Manually combine all) **8323125**
- 66 "Great Britain" [ALL] **353864**
- 67 Scotland [ALL] **198,883**
- 68 "Northern Ireland"[ALL] **87318**
- 69 "Wales" **440569**
- 70 ("Great Britain "or Britain or England or Scotland or "Wales" or Ireland or UK or "United Kingdom" or welsh or english or scottish or irish)**122436**
- 71 #66-70 (Manually combine all) **100070**
- 72 9 and 65 and 71 **306978**
- 73 limit search result 72, to years 2013-2014, manually input all limitations/exclusions as per the protocol into the relevant boxes **188**

## Database: Web of Science

### Search Strategy:

- 
1. TS=(Junior doctor\*) [762]
  2. TS=("pre-registration house officer") [3]
  3. TS=("foundation doctor\*" OR (F1 NEAR/3 doctor) OR (FY1 NEAR/3 doctor) OR (F2 N/3 doctor) OR (FY2 N/3 doctor) OR "foundation year 1" OR "foundation year one" OR " foundation year 2" OR "foundation year two") [91]
  4. TS=((PRHO\* OR "houseman\*" OR "house man\*" OR " house officer\*" OR intern)) [2022]
  5. TS=(new\* qualif\* doctor\*) [148]
  6. TS=((SHO OR "senior house officer\*")) [302]
  7. TS=((medic\* NEAR/3 graduat\*)) [2435]
  8. TS=("Internship and Residency") [218]
  9. #8 OR #7 OR #6 OR #5 OR #4 OR #3 OR #2 OR #1 [5506]
  10. TS="Professional Competence" [3952]
  11. TS="Clinical Competence" [3686]
  12. TS="Self Efficacy" [20815]
  13. TS= (Confidence NEAR/3 practice) [250]
  14. TS="Professional Practice" [23504]
  15. TS=(Resilience AND Psychological) [1082]
  16. TS=(coping behavio\$r) [5582]

17. TS="Competency-Based Education" [201]
18. TS=(\*"Education, Medical, Graduate") [27]
19. TS=(\*"Education, Medical") [241]
20. TS="Education, Medical, Continuing" [19]
21. TS= (prepar\* NEAR/3 practi\*) [1651]
22. TS=((readiness OR ready) NEAR/3 practi\*) [252]
23. TS=(transition\* NEAR/3 pract\*) [675]
24. TS=((Competence OR prepare\* OR confiden\* OR ready) NEAR/3 (practise OR purpose OR employab\*)) [1755]
25. TS= (resilien\* NEAR/3 medical) [24]
26. TS= (effective\* N/3 "medical curriculum") [3]
27. TS="foundation train\*" [51]
28. TS= "medical education" [22767]
29. TS= professionalism [3001]
30. TS= "prescribing skill\*" [34]
31. TS= "scientific knowledge" [2910]
32. TS= (fitness NEAR/3 practice) [134]
33. TS= (fitness NEAR/3 purpose) [240]
34. TS= (defin\* NEAR/3 practi\*) [2020]
35. TS= (asses\* NEAR/3 prepar\*) [1234]
36. TS= (toler\* NEAR/3 uncert\*) [343]
37. TS= "Leadership" [19282]
38. TS= "Ethical manner" [37]
39. TS= "Clinical analysis" [1117]
40. TS= "Clinical\* effective\*" [3166]
41. TS= "Communicate effectively" [229]
42. TS= (\*"Communication") [164602]
43. TS= (Communicate AND appropriately) [166]
44. TS= "Clinical responsibil\*" [86]
45. TS= (Adapt NEAR/3 chang\*) [4731]
46. TS= "Patient safety" [8225]
47. TS= "\*Patient Safety" [8236]
48. TS= "Clinical judgement" [253]
49. TS= "Patient care" [10395]
50. TS= (\*"Quality Assurance" AND "Health Care") [511]
51. TS= "Quality assurance" [8436]
52. TS= (CPD OR "Continuing professional development") [1951]
53. TS= (Inadequate NEAR/3 (supervision OR train\* OR support OR preparedness)) [820]
54. TS= ((Inadequate OR clinical) NEAR/3 (supervision OR train\* OR support OR preparedness)) [11630]
55. TS= "clinical performance" [1969]
56. TS= (Situation NEAR/3 uncertainty) [347]
57. TS= (Emergency NEAR/3 judgement) [20]
58. TS= "Safe prescribing" [53]
59. TS= "Reflection" [52410]
60. TS="Feedback" [92069]
61. TS= (Work NEAR/3 autonomously) [98]
62. TS=(Assistantship OR Mentoring) [4934]
63. TS= "psychology knowledge" [12]
64. TS= Psychology [27007]
65. #64 OR #63 OR #62 OR #61 OR #60 OR #59 OR #58 OR #57 OR #56 OR #55 OR #54 OR #53 OR #52 OR #51 OR #50 OR #49 OR #48 OR #47 OR #46 OR #45 OR #44 OR #43 OR #42 OR #41 OR #40 OR #39 OR #38 OR #37 OR #36 OR #35 OR #34 OR #33 OR #32 OR #31 OR #30 OR #29 OR #28 OR #27 OR #26 OR #25 OR #24 OR #23 OR #22 OR #21 OR #20 OR #19 OR #18 OR #17 OR #16 OR #15 OR #14 OR #13 OR #12 OR #11 OR #10 [458528]

66. TS= "Great Britain" [3843]
67. TS= Scotland [7635]
68. TS="Northern Ireland" [2307]
69. TS=Wales [10767]
70. TS= ("Great Britain" OR Britain OR England OR Scotland OR Wales OR Ireland OR UK OR "United Kingdom" OR welsh OR english OR scottish OR irish) [217928]
71. #70 OR #69 OR #68 OR #67 OR #66 [127342]
72. 9 and 65 and 71 [25]

## List of all Search Results including Additional Web Sites and Journals Searched

2009-2013

| <b>DATABASES</b>                                         | <b>Researcher</b> | <b>Date</b> | <b>Results</b> |
|----------------------------------------------------------|-------------------|-------------|----------------|
| Cinahl                                                   | EP                | 10.07.13    | 191            |
| ERIC                                                     | EP                | 10.07.13    | 91             |
| Embase                                                   | LJG               | 09.07.13    | <b>387</b>     |
| Medline                                                  | MM                | 10.07.13    | 436            |
| Medline in Process                                       | MM                | 10.07.13    | 26             |
| Psycinfo                                                 | ZJ                | 10.07.13    | 51             |
| WOK- Web of science                                      | EP                | 10.07.13    | 253            |
| Scopus                                                   | LJG               | 09.07.13    | 199            |
| HMIC                                                     | EP                | 10.07.13    | 71             |
|                                                          |                   |             | <b>TOTAL</b>   |
|                                                          |                   |             | <b>1705</b>    |
| <b>WEBSITES</b>                                          | <b>Researcher</b> | <b>Date</b> | <b>Results</b> |
| Academy of Medical Royal Colleges                        | LJG               | 05.07.13    | 0              |
| General Medical Council                                  | LJG               | 08.07.13    | 60             |
| Health Education England                                 | EP                | 08.07.13    | 0              |
| Royal College of Psychiatrists                           | EP                | 08.07.13    | 0              |
| The Royal College of Midwives                            | EP                | 08.07.13    | 0              |
| Royal College of Nursing                                 | EP                | 08.07.13    | 0              |
| Royal College of General Practitioners                   | EP                | 08.07.13    | 0              |
| Royal College of Physicians                              | LJG               | 08.07.13    | 30             |
| Royal College of Obstetricians and Gynaecologists        | LJG               | 08.07.13    | 11             |
| Royal College of Paediatrics and Child Health            | LJG               | 08.07.13    | 18             |
| Royal College of Anaesthetists                           | LJG               | 08.07.13    | 0              |
| The Royal College of Surgeons of England                 | LJG               | 08.07.13    | 55             |
| Royal College of Pathologists                            | ZJ                | 10.07.13    | 0              |
| The Royal College of Radiologists                        | ZJ                | 10.07.13    | 0              |
| The Royal College of Surgeons of Edinburgh               | EP                | 08.07.13    | 0              |
| The Royal College of Ophthalmologists                    | ZJ                | 05.07.13    | 0              |
| Royal College and Physicians and Surgeons of Glasgow     | ZJ                | 08.07.13    | 86             |
| Membership of the Royal Colleges of Physicians of the UK | LJG               | 05.07.13    | 0              |

|                                           |     |          |              |
|-------------------------------------------|-----|----------|--------------|
| Healthboard East Midlands                 | LJG | 05.07.13 | 0            |
| Healthboard East of England               | LJG | 05.07.13 | 0            |
| Healthboard Yorkshire and Humber          | LJG | 05.07.13 | 0            |
| Healthboard Wessex                        | LJG | 05.07.13 | 0            |
| Healthboard Thames Valley                 | LJG | 05.07.13 | 0            |
| Healthboard North West London             | LJG | 05.07.13 | 0            |
| Healthboard South London                  | LJG | 05.07.13 | 0            |
| Healthboard North Central and East London | LJG | 05.07.13 | 0            |
| Healthboard Kent, Surrey and Sussex       | LJG | 05.07.13 | 0            |
| Healthboard North East                    | LJG | 05.07.13 | 0            |
| Healthboard North West                    | LJG | 05.07.13 | 0            |
| Healthboard West Midlands                 | LJG | 05.07.13 | 0            |
| Healthboard South West                    | LJG | 05.07.13 | 0            |
|                                           |     |          | <b>TOTAL</b> |
|                                           |     |          | <b>260</b>   |

| <b>JOURNALS</b>                                           | <b>Researcher</b> | <b>Date</b> | <b>Results</b> |
|-----------------------------------------------------------|-------------------|-------------|----------------|
| Academic Medicine                                         | EP                | 05.07.13    | 226            |
| Advances in Health Sciences Education                     | LJG               | 04.07.13    | 70             |
| Annals of The Royal College of Surgeons of England        | LJG               | 05.07.13    | 105            |
| BMC Medical Education                                     | LJG               | 04.07.13    | 108            |
| BMJ                                                       | LJG               | 04.07.13    | 23             |
| BMJ Quality and safety                                    | ZJ                | 08.07.13    | 195            |
| Clinical Teacher                                          | EP                | 04.07.13    | 209            |
| Evaluation and the Health Professions                     | ZJ                | 05.07.13    | 16             |
| International Journal for Quality and Health Care         | EP                | 08.07.13    | 17             |
| Journal of American Medical Association                   | LJG               | 04.07.13    | 40             |
| Journal of Continuing Education in the Health Professions | ZJ                | 10.07.13    | 51             |
| Journal of Graduate Medical Education                     | LJG               | 05.07.13    | 207            |
| Medical Defence Union Journal                             | LJG               | 08.07.13    | 145            |
| Medical Education                                         | LJG               | 04.07.13    | 31             |
| Medical Teacher                                           | EP                | 05.07.13    | 44             |
| New England Journal of Medicine                           | EP                | 05.07.13    | 21             |
| Postgraduate Medical Journal                              | ZJ                | 04.07.13    | 176            |
| Student British Medical Journal                           | EP                | 08.07.13    | 102            |
| The British Journal of General Practice                   | EP                | 08.07.13    | 7              |
| The Lancet                                                | EP                | 08.07.13    | 4              |
|                                                           |                   |             | <b>TOTAL</b>   |
|                                                           |                   |             | <b>1797</b>    |

**GRAND TOTAL 3762**

2013 – 2014

| <b>DATABASES</b>                                         | <b>Researcher</b> | <b>Date</b> | <b>Results</b> |
|----------------------------------------------------------|-------------------|-------------|----------------|
| Cinahl                                                   | LJG               | 06.05.14    | 47             |
| ERIC                                                     | LJG               | 06.05.14    | 64             |
| Embase                                                   | LJG               | 06.05.14    | <b>43</b>      |
| HMIC                                                     | LJG               | 06.05.14    | 11             |
| Medline                                                  | LJG               | 06.05.14    | 98             |
| Medline without Revisions                                | LJG               | 06.05.14    | 93             |
| Medline in Process                                       | LJG               | 06.05.14    | 0              |
| Psycinfo                                                 | LJG               | 06.05.14    | 11             |
| Scopus                                                   | LJG               | 06.05.14    | 188            |
| WOS- Web of science                                      | LJG               | 06.05.14    | 25             |
|                                                          |                   |             | <b>TOTAL</b>   |
|                                                          |                   |             | <b>580</b>     |
| <b>WEBSITES</b>                                          | <b>Researcher</b> | <b>Date</b> | <b>Results</b> |
| Academy of Medical Royal Colleges                        | LJG               | 07.05.14    | 0              |
| General Medical Council                                  | LJG               | 07.05.14    | 0              |
| Health Education England                                 | LJG               | 07.05.14    | 0              |
| Royal College of Psychiatrists                           | LJG               | 07.05.14    | 0              |
| The Royal College of Midwives                            | LJG               | 07.05.14    | 0              |
| Royal College of Nursing                                 | LJG               | 07.05.14    | 0              |
| Royal College of General Practitioners                   | LJG               | 07.05.14    | 0              |
| Royal College of Physicians                              | LJG               | 07.05.14    | 0              |
| Royal College of Obstetricians and Gynaecologists        | LJG               | 07.05.14    | 0              |
| Royal College of Paediatrics and Child Health            | LJG               | 07.05.14    | 0              |
| Royal College of Anaesthetists                           | LJG               | 07.05.14    | 0              |
| The Royal College of Surgeons of England                 | LJG               | 07.05.14    | 0              |
| Royal College of Pathologists                            | LJG               | 07.05.14    | 0              |
| The Royal College of Radiologists                        | LJG               | 07.05.14    | 0              |
| The Royal College of Surgeons of Edinburgh               | LJG               | 07.05.14    | 0              |
| The Royal College of Ophthalmologists                    | LJG               | 07.05.14    | 0              |
| Royal College and Physicians and Surgeons of Glasgow     | LJG               | 07.05.14    | 0              |
| Membership of the Royal Colleges of Physicians of the UK | LJG               | 07.05.14    | 0              |
| Healthboard East Midlands                                | LJG               | 07.05.14    | 0              |
| Healthboard East of England                              | LJG               | 07.05.14    | 0              |
| Healthboard Yorkshire and Humber                         | LJG               | 07.05.14    | 0              |
| Healthboard Wessex                                       | LJG               | 07.05.14    | 0              |
| Healthboard Thames Valley                                | LJG               | 07.05.14    | 0              |
| Healthboard North West London                            | LJG               | 07.05.14    | 0              |

|                                           |     |              |   |
|-------------------------------------------|-----|--------------|---|
| Healthboard South London                  | LJG | 07.05.14     | 0 |
| Healthboard North Central and East London | LJG | 07.05.14     | 0 |
| Healthboard Kent, Surrey and Sussex       | LJG | 07.05.14     | 0 |
| Healthboard North East                    | LJG | 07.05.14     | 0 |
| Healthboard North West                    | LJG | 07.05.14     | 0 |
| Healthboard West Midlands                 | LJG | 07.05.14     | 0 |
| Healthboard South West                    | LJG | 07.05.14     | 0 |
|                                           |     | <b>Total</b> | 0 |

| <b>JOURNALS</b>                                           | <b>Researcher</b> |          |              |
|-----------------------------------------------------------|-------------------|----------|--------------|
| Academic Medicine                                         | LJG               | 07.05.14 | 0            |
| Advances in Health Sciences Education                     | LJG               | 07.05.14 | 229          |
| Annals of The Royal College of Surgeons of England        | LJG               | 07.05.14 | 0            |
| BMC Medical Education                                     | LJG               | 07.05.14 | 207          |
| BMJ                                                       | LJG               | 07.05.14 | 0            |
| BMJ Quality and safety                                    | LJG               | 07.05.14 | 0            |
| Clinical Teacher                                          | LJG               | 07.05.14 | 148          |
| Evaluation and the Health Professions                     | LJG               | 07.05.14 | 0            |
| International Journal for Quality and Health Care         | LJG               | 07.05.14 | 0            |
| Journal of American Medical Association                   | LJG               | 07.05.14 | 1            |
| Journal of Continuing Education in the Health Professions | LJG               | 07.05.14 | 0            |
| Journal of Graduate Medical Education                     | LJG               | 07.05.14 | 0            |
| Medical Defence Union Journal                             | LJG               | 07.05.14 | 0            |
| Medical Education                                         | LJG               | 07.05.14 | 278          |
| Medical Teacher                                           | LJG               | 07.05.14 | 0            |
| New England Journal of Medicine                           | LJG               | 07.05.14 | 0            |
| Postgraduate Medical Journal                              | LJG               | 07.05.14 | 17           |
| Student British Medical Journal                           | LJG               | 07.05.14 | 0            |
| The British Journal of General Practice                   | LJG               | 07.05.14 | 0            |
| The Lancet                                                | LJG               | 07.05.14 | 0            |
|                                                           |                   |          | <b>TOTAL</b> |
|                                                           |                   |          | <b>880</b>   |

GRAND TOTAL 1460
