# Supplementary material for: How prepared are UK medical graduates for practice? A rapid review of the literature 2009–2014
Source: PubMed Central journal article supplement — BMJ Open. 2017 Jan 13;7(1):e013656. doi: 10.1136/bmjopen-2016-013656 (PMC5253586; doi:10.1136/bmjopen-2016-013656), 2017-01-13
Supplement: bmjopen-2016-013656suppB.pdf [file bmjopen-2016-013656suppB.pdf]

## Online Supplement B: Quality assessment criteria

### Quality Indicator for QUANTITATIVE studies

| <b>Quality Indicator</b> | <b>Detail</b>                                                                                                                                                                                                     |
|--------------------------|-------------------------------------------------------------------------------------------------------------------------------------------------------------------------------------------------------------------|
| Research question        | Is the research question(s) or hypothesis clearly stated?                                                                                                                                                         |
| Study Participants       | Is the participant group appropriate for the study being carried out (number, characteristics, selection, and homogeneity)? Were the participants from more than one location?                                    |
| 'Data' collection method | Are the methods used reliable and valid for the research question and context?                                                                                                                                    |
| Completeness of 'data'   | Have participants dropped out? Is this attrition rate less than 50%? For questionnaire based studies, is the response rate acceptable (60% or above) or has the response rate issue been addressed appropriately? |
| Control for confounding  | Have multiple factors/variables been removed or accounted for where possible?                                                                                                                                     |
| Analysis of results      | Are the statistical methods appropriately used? If not, why not?                                                                                                                                                  |
| Conclusions              | Is it clear that the data justify the conclusions drawn as reported in the abstract?                                                                                                                              |
| Reproducibility          | Could the study be repeated by other researchers?                                                                                                                                                                 |
| Theoretical Perspective  | What is the theory? Is it explicit?                                                                                                                                                                               |
| Study design             | What is the design of the study? Is it explicit?                                                                                                                                                                  |
| Ethical issues           | Were all relevant ethical issues addressed? If not, what wasn't addressed?                                                                                                                                        |

### Quality Indicator for QUALITATIVE studies

| <b>Quality Indicator</b>                                     | <b>Detail</b>                                                                                                                                                                                                                                                                                              |
|--------------------------------------------------------------|------------------------------------------------------------------------------------------------------------------------------------------------------------------------------------------------------------------------------------------------------------------------------------------------------------|
| Research question                                            | Is the research question(s) clearly stated?                                                                                                                                                                                                                                                                |
| Study Participants                                           | Is the participant group appropriate for the study being carried out (number, characteristics, selection and homogeneity/diversity)? Are the participants from more than one location?                                                                                                                     |
| Theoretical Perspective                                      | What is the theory? Is it explicit? Is it apriori or post hoc?                                                                                                                                                                                                                                             |
| 'Data' collection method                                     | Are the methods used reliable and valid for the research question, context and theory?                                                                                                                                                                                                                     |
| Completeness of 'data'                                       | Have participants dropped out? Is this attrition rate less than 50%?                                                                                                                                                                                                                                       |
| Analysis of results                                          | Are the analytical methods appropriately used? Was there more than one person developing the thematic coding framework (if there was one)? If not, why not?                                                                                                                                                |
| Conclusions                                                  | Is it clear that the data justify the conclusions drawn as reported in the abstract?                                                                                                                                                                                                                       |
| Reproducibility                                              | Could the study be repeated by other researchers?                                                                                                                                                                                                                                                          |
| Study design                                                 | What is the design of the study? Is it explicit?                                                                                                                                                                                                                                                           |
| Clear explanation of methods of data collection and analysis | Is there a clear account of the process of data collection and analysis? Is there sufficient data (quotations) to judge whether the authors' interpretation is adequately supported? Alternatively, do the researchers rely too heavily on verbatim quotes with little of their own description of themes? |

|                             |                                                                                                                                                                                      |
|-----------------------------|--------------------------------------------------------------------------------------------------------------------------------------------------------------------------------------|
| Fair dealing                | Does the research design explicitly incorporate a range of different perspectives so one group is not presented as if it represents the whole truth about a situation.               |
| Ethical issues              | Were all relevant ethical issues addressed? If not, what wasn't addressed?                                                                                                           |
| Attention to negative cases | As well exploring alternative explanations for the data, have the authors discussed elements in the data that (apparently) contradict the 'main trend' of the phenomena under study. |
| Reflexivity                 | Have the authors reflected on their role(s) in the study? What is the relationship between the researcher and the participants?                                                      |

### **Quality Indicator for MIXED METHODS studies**

Use both sets of indices depending on the part of the study you are assessing – and also consider the issue of 'Triangulation' - are the results from either two or more different methods of data collection (for example, interviews and questionnaires) comparable? Did the researchers look for patterns of convergence to develop or corroborate their interpretation?
